## **Knowledge, attitudes and biosecurity practices among the small-scale dairy farmers in Sylhet District, Bangladesh**

Tonmoy Chowdhury<sup>1</sup>, Junayed Ahmed<sup>1</sup>, Md Tafazzal Hossain<sup>1</sup>, Mithu Chandra Roy<sup>1</sup>, Md Ashik-Uz-Zaman<sup>1</sup>, Md Nazim Uddin<sup>2</sup>, Md Masudur Rahman<sup>3</sup>, Md Golam Kabir<sup>4</sup>, Ferdaus Mohd Altaf Hossain<sup>1\*</sup>

<sup>1</sup>*Department of Dairy Science, Faculty of Veterinary, Animal and Biomedical Sciences; Sylhet Agricultural University, Bangladesh*

<sup>2</sup>*Department of Livestock Production and Management, Faculty of Veterinary, Animal and Biomedical Sciences; Sylhet Agricultural University, Bangladesh*

<sup>3</sup>*Department of Pathology, Faculty of Veterinary, Animal and Biomedical Sciences; Sylhet Agricultural University, Bangladesh*

<sup>4</sup>*Integrated Livestock Development Project (ILDP) in Haor Areas, Department of Livestock Services (DLS), Dhaka, Bangladesh*

**\*Corresponding author: [ferdaus.dps@sau.ac.bd](mailto:ferdaus.dps@sau.ac.bd)**

### **Acknowledgements**

We like to disclose our gratitude to the Chairman of Dairy Science department to assist us with this study.

### **Funding statement**

The work was conducted through the partial funding facilitated by University Grants Commission of Bangladesh.

### **Authors' contribution statement**

TC and FMAH designed the work strategies

TC, JA and MTH collected data

TC, MCR, MAUZ and MNU analyzed the data

TC, MMR and MGK prepared the draft with the help of FMAH

### **Author Approval**

All authors have seen and approved the manuscript.

### **Conflict of interest**

All authors declaring that there is no conflict of interest.

1 **Abstract**

2 **Background:** In the context of zoonosis, Bangladesh's small-scale dairying is yet to frame  
3 satisfactory levels due to poor biosecurity practices.

4 **Objectives:** This study intended to reveal the degree of knowledge, attitudes, and biosecurity  
5 practices among Sylhet district, Bangladesh's small-scale dairy farmers. We also focused on  
6 the association between biosecurity practices and the incidence of non-specific enteritis in  
7 humans.

8 **Methods:** A questionnaire-based survey was conducted on the farmers' KAP via personal  
9 interviews of 15 farmers from the randomly selected fifteen small-scale dairy farms. The  
10 questionnaire was developed with six questions for knowledge, six questions for attitude, and  
11 12 questions for the practice of biosecurity measures. Alongside that, data on the number of  
12 non-specific enteritis cases experienced by the farmers or their family members were also  
13 recorded. Spearman correlation was used to find out the correlation among KAP variables and  
14 between practice scores and non-specific enteritis incidences.

15 **Results:** We found an insignificant ( $p > 0.05$ ) influence of demographic characteristics over  
16 knowledge, attitude, and biosecurity practices. Significant ( $p < 0.05$ ) and strong correlations  
17 were found in knowledge-attitude ( $r = 0.65$ ), knowledge-practice ( $r = 0.71$ ), and attitude-  
18 practice ( $r = 0.64$ ). Incidences of non-specific enteritis and biosecurity measures' practice were  
19 also strongly correlated ( $r = -0.9232$ ) and statistically significant ( $p < 0.05$ ).

20 **Conclusions:** Our study suggests that increasing knowledge and developing a good attitude  
21 are necessary to increase the adaptation of biosecurity measures as three of these factors are  
22 correlated. Also, farm biosecurity measures are closely related to human health.

23 **Keywords:** Bangladesh, farm biosecurity, KAP analysis, non-specific enteritis, small-scale  
24 dairying

25

## 26 **Introduction**

27 The farms act as a source of several pathogenic microorganisms which can cause animal and  
28 human health risks (An et al., 2018; Castells & Colina, 2021; Stein & Katz, 2017). Infectious  
29 diseases cause severe economic losses to farms as well as result in dissatisfaction among  
30 farmers, veterinarians, consumers, and different stakeholders (Makita et al., 2020). In  
31 Bangladesh, there is a high risk of infectious disease spread such as Foot and Mouth disease  
32 (FMD) (Youssef et al., 2021). Gastroenteritis in humans can also be traced to animal-origin  
33 food; for example, enteritis causing *Campylobacter* and *Escherichia coli* (An et al., 2018; Stein  
34 & Katz, 2017). To prevent the risk of spreading these types of diseases adaption of biosecurity  
35 measures on farms plays an important role (Can & Altuğ, 2014). Adapting good biosecurity  
36 measures also helps to improve production efficiency as well (Brennan & Christley, 2012).

37 However, it is hard to adapt standard biosecurity measures as it depends on various factors like  
38 farmers' knowledge, implementation cost, workforce, implementation complexity, and  
39 biosecurity measures differ from region to region (Can & Altuğ, 2014). Before that, in a  
40 developing country like Bangladesh, it is important to understand the mindset of the farmers  
41 and the factors that influence biosecurity practices which could aid in the implementation of  
42 any project regarding biosecurity awareness and practice. There is a lack of studies and  
43 available data regarding this topic. Hence, KAP analysis is an efficient tool to draw a  
44 conclusion for this purpose. Conducting KAP analysis, it is easier to understand the depth of  
45 awareness of the farmers about biosecurity.

46 Hence, considering above mentioned facts we have conducted the study to understand if the  
47 demographic characteristics of the farmers have any influence on biosecurity practice. Also,  
48 the nature of association among knowledge, attitude, and practice regarding the biosecurity  
49 practice of the farmers. And to find out the association between biosecurity practice and the  
50 risk of enteritis in farmers and their family members who are directly or indirectly related to  
51 the farms or consume milk from that farm.

52

## 53 **Materials and Methods**

### 54 *Study Area*

55 This study was conducted on a total of 15 randomly selected dairy farms (farms having not  
56 more than 30 animals) in different parts of Sylhet Sadar upazila (24.90568306031467,

57 91.87500530754328) of Sylhet district; a medium-sized city, situated in the northeast part of  
58 Bangladesh (Figure 1). The Sylhet sadar upazila is one of the 13 upazilas under the Sylhet  
59 district and has almost every geographical characteristic of all other upazilas including hilly  
60 areas and relatively low laying lands as well. It also includes urban and rural area sites as well.  
61 So, the farms from Sylhet sadar upazilas that were included in the study will show almost a  
62 similar image of the Sylhet district.

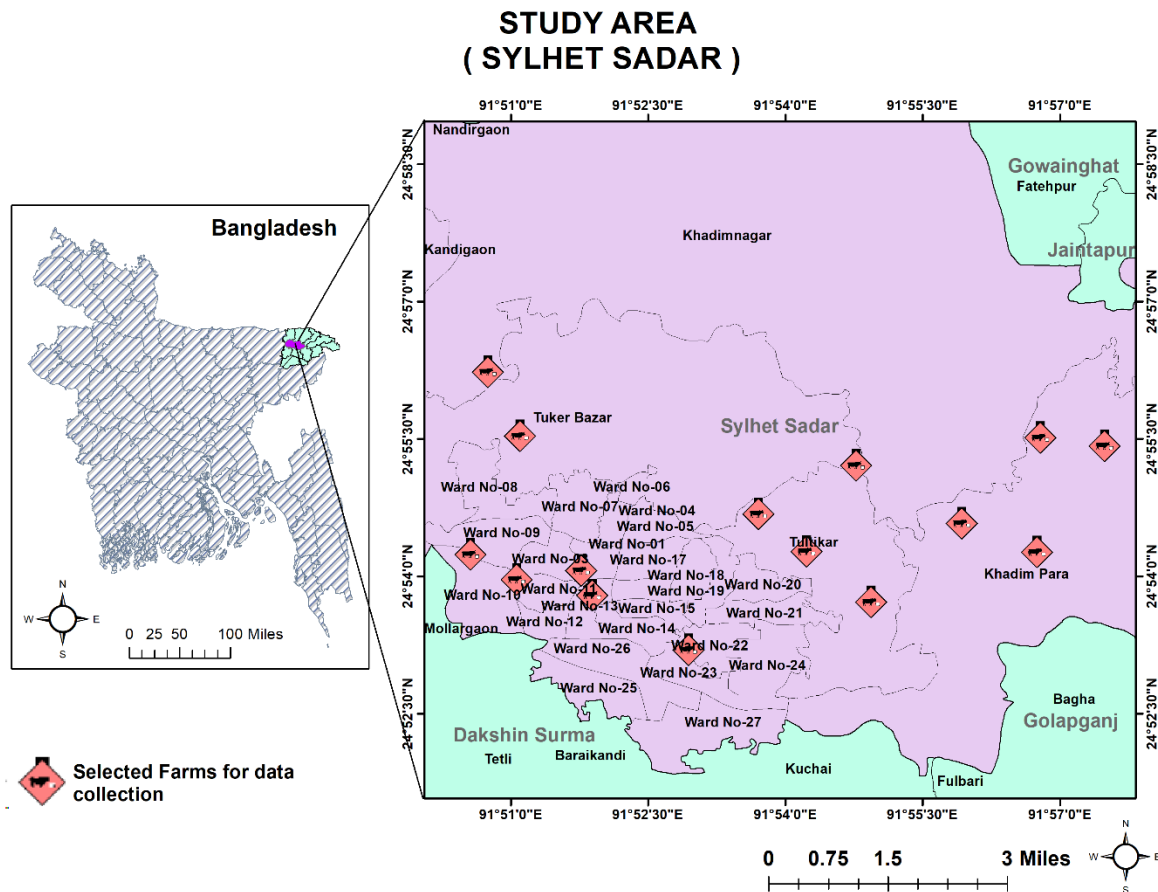

63

64 **Figure 1: Map of the study area (Sylhet Sadar upazila, Sylhet district, Bangladesh).**

65 ***Data collection***

66 Unfortunately, there was no reliable official data available regarding the number of small-scale  
67 dairy farms. However, we were able to locate 37 small-scale dairy farms in the Sylhet Sadar  
68 region that were operating and actively delivering their dairy products to market, and 23 of the  
69 farms agreed to participate in the interview. Out of those 23 farms, we randomly chose 15  
70 farms to ensure that there was no bias and to ensure random selection. Using the prescribed  
71 questionnaire, we collected the related data by personally interviewing the farmers (15 farmers;  
72 one from each farm) from the 15 randomly selected farms in January 2022 and recorded on  
73 Microsoft excel 2021. Knowledge, attitude, and practices regarding biosecurity may vary based

74 on different regions; as a result, the questionnaire was developed by modifying the question  
75 sets from two previous studies conducted in Japan and Turkey (Can & Altuğ, 2014; Makita et  
76 al., 2020). The questionnaire had a total of 30 questions and we divided the questions into 4  
77 sectors- (1) Demographic characteristics (6 questions; D1 to D6), (2) Knowledge (6 questions;  
78 K1 to K6), (3) Attitude (6 questions; A1 to A6) and (4) Practice (12 questions; P1 to P12). For  
79 knowledge, attitude, and practice, we set two choices to answer a question- ‘Yes’ and ‘No’.  
80 For each positive response (Yes) the responder was given one point and for a negative response  
81 (‘No’) no point was rewarded. The possible lowest scores for knowledge, attitude, and practice  
82 could be zero (0) and the possible highest scores for knowledge, attitude, and practice could be  
83 6, 6, and 12 respectively.

84 The data about the incidence of non-specific enteritis (unknown etiology) experienced in the  
85 last 2 months by farmers or their family members who either consume the farm milk or work  
86 on the farm were collected along with the above-mentioned questionnaire. If the individual  
87 experienced diarrhea (loose stool) more than 3 times in 24 hour period with or without other  
88 additional symptoms like abdominal pain, nausea, and mucous in stool was considered non-  
89 specific enteritis (Baqui et al., 1991; Dey et al., 2007). However, if the individual was having  
90 any other illness or medication that could develop diarrhea or other additional symptoms  
91 (abdominal pain, nausea, and mucous in stool) was not included in the non-specific enteritis  
92 record. Furthermore, we recorded only those cases as non-specific enteritis in which the patient  
93 had to seek medical attention and enteritis were diagnosed by a registered clinician.

#### 94 *Statistical analysis*

95 We did descriptive analysis to find out the frequency, mean, and standard deviation (SD) of  
96 the variables. The scores of different variables (Knowledge, Attitude, and Practice) were  
97 treated as continuous variables. Test of normality was also performed to identify the  
98 distribution of the data. Then we performed non-parametric Independent-Samples Kruskal-  
99 Wallis test to determine the association among different variables such as demographic  
100 characteristics, knowledge scores, attitude scores, practice scores, etc. We used IBM SPSS  
101 Statistics v.26.0.0.0 for that statistical analysis. Finally, we conducted Spearman’s correlation  
102 test among scores of knowledge, attitude, and practice using GraphPad Prism 9.3.1 to  
103 determine the correlation coefficient ( $r$ ). Spearman’s correlation test was also conducted to  
104 determine the correlation between biosecurity practice score and non-specific enteritis  
105 incidence. The significance levels of all the tests were  $p < 0.05$ .

106 **Results**

107 *Frequency percentages and mean scores of knowledge, attitude and practice*

108 The frequency percentages and mean scores for individual questions of knowledge (K1 to K6)  
 109 and attitude (A1 to A6) are shown in (Table 1). The highest positive response (80%) was found  
 110 in K4 and the lowest (46.7%) was found in K2 and K6. The frequency percentage of K1, K3,  
 111 and K5 were equal (60%) (Table 1). In the case of AS, the highest positive response was found  
 112 in A5 (73.3%) and the lowest was in A2 (33.3%) (Table 1). The percentage of positive response  
 113 of A1, A3, A4, and A6 was 53.3%, 60%, 53.3%, and 60% respectively (Table 1). The frequency  
 114 percentages and mean PS (P1 to P12) are shown in (Table 2). The highest positive response  
 115 (93.3%) was found in P6 and P10 and the lowest (13.3%) was found in P11 (Table 2). P1 and  
 116 P7 showed the second-highest positive response (86.7%) (Table 2).

117 **Table 1: Knowledge and attitude scores of the farmers (N=15) regarding farm**  
 118 **biosecurity.**

| ID                          | Description                                                                                                   | Mean | SD    | Frequency (%) |           |
|-----------------------------|---------------------------------------------------------------------------------------------------------------|------|-------|---------------|-----------|
|                             |                                                                                                               |      |       | No            | Yes       |
| <b>Knowledge Score (KS)</b> |                                                                                                               |      |       |               |           |
| <b>K1</b>                   | Knows about biosecurity guidelines.                                                                           | 0.60 | 0.507 | 6 (40%)       | 9 (60%)   |
| <b>K2</b>                   | Knows about local dairy association's biosecurity guidelines.                                                 | 0.47 | 0.516 | 8 (53.3%)     | 7 (46.7%) |
| <b>K3</b>                   | Knowledge about commonly occurring disease (fmd, mastitis, lumpy skin disease, milk fever, ketosis) symptoms. | 0.60 | 0.507 | 6 (40%)       | 9 (60%)   |
| <b>K4</b>                   | Knowledge about training and seminar.                                                                         | 0.80 | 0.414 | 3 (20%)       | 12 (80%)  |
| <b>K5</b>                   | Knowledge about record keeping.                                                                               | 0.60 | 0.507 | 6 (40%)       | 9 (60%)   |
| <b>K6</b>                   | Knowledge of disease spread from outsider or neighboring farm.                                                | 0.47 | 0.516 | 8 (53.3%)     | 7 (46.7%) |
| <b>Attitude Score (AS)</b>  |                                                                                                               |      |       |               |           |
| <b>A1</b>                   | I think seminars and training session on dairy farming are useful.                                            | 0.53 | 0.516 | 7 (46.7%)     | 8 (53.3%) |
| <b>A2</b>                   | I have priority towards information sources and activity.                                                     | 0.33 | 0.488 | 10 (66.7%)    | 5 (33.3%) |

|           |                                                                            |      |       |           |            |
|-----------|----------------------------------------------------------------------------|------|-------|-----------|------------|
| <b>A3</b> | I am concerned about biosecurity guidelines and importance of biosecurity. | 0.60 | 0.507 | 6 (40%)   | 9 (60%)    |
| <b>A4</b> | I am satisfied about hygiene management in the farm.                       | 0.53 | 0.516 | 7 (46.7%) | 8 (53.3%)  |
| <b>A5</b> | I believe only necessary visits should be allowed.                         | 0.73 | 0.458 | 4 (26.7%) | 11 (73.3%) |
| <b>A6</b> | I believe cleaning and disinfection of vehicles reduces biosecurity risk.  | 0.60 | 0.507 | 6 (40%)   | 9 (60%)    |

119 SD = Standard Deviation;

120

121 **Table 2: Practice scores (PS) of the farmers (N=15) regarding farm biosecurity.**

| ID         | Description                                               | Mean | SD    | Frequency (%) |            |
|------------|-----------------------------------------------------------|------|-------|---------------|------------|
|            |                                                           |      |       | No            | Yes        |
| <b>P1</b>  | Test diseases before buying.                              | 0.87 | 0.352 | 2 (13.3%)     | 13 (86.7%) |
| <b>P2</b>  | Quarantine for new animal on arrival.                     | 0.53 | 0.516 | 7 (46.7%)     | 8 (53.3%)  |
| <b>P3</b>  | Inspection made by veterinarian on arrival of new animal. | 0.53 | 0.516 | 7 (46.7%)     | 8 (53.3%)  |
| <b>P4</b>  | Use hygiene precautions before handling animal feed.      | 0.80 | 0.414 | 3 (20%)       | 12 (80%)   |
| <b>P5</b>  | Isolating Sick animals.                                   | 0.40 | 0.507 | 9 (60%)       | 6 (40%)    |
| <b>P6</b>  | Treatment of Sick animals until clinical sign disappear.  | 0.93 | 0.258 | 1 (6.7%)      | 14 (93.3%) |
| <b>P7</b>  | Vaccination against common contagious diseases.           | 0.87 | 0.352 | 2 (13.3%)     | 13 (86.7%) |
| <b>P8</b>  | Culling animals that are unresponsive to treatment.       | 0.80 | 0.414 | 3 (20%)       | 12 (80%)   |
| <b>P9</b>  | Having insect and rodent control plan.                    | 0.33 | 0.488 | 10 (66.7%)    | 5 (33.3%)  |
| <b>P10</b> | Regular Cleaning and Disinfection of farm.                | 0.93 | 0.258 | 1 (6.7%)      | 14 (93.3%) |



|            |                                       |      |       |               |              |
|------------|---------------------------------------|------|-------|---------------|--------------|
| <b>P11</b> | Footbath in the entrance.             | 0.13 | 0.352 | 13<br>(86.7%) | 2<br>(13.3%) |
| <b>P12</b> | Clean udder before and after milking. | 0.80 | 0.414 | 3 (20%)       | 12 (80%)     |

122 SD = Standard Deviation;

123

124 ***Comparison of knowledge, attitude and practice scores of demographic characteristics***

125 Comparison of the mean knowledge score (KS), mean attitude score (AS) and mean practice  
126 score (PS) according to demographic characteristics are shown in (Table 3). For D1, we found  
127 the highest mean KS (4.0) and mean PS (9.3) in the >40 years age group, and the highest mean  
128 AS (3.7) in the < 30 years age group (Table 3). For D2, the highest mean KS (3.7) and mean  
129 AS (3.8) were observed in the Secondary education group, whereas the highest mean PS (8.6)  
130 was identified in the Graduation group (Table 3). For D3, we identified the highest mean KS  
131 (3.7) in the group with less than 10 years of farming experience, as well as the highest mean  
132 AS (4.5) and mean PS (8.5) in the group with more than 20 years of farming experience  
133 (Table3). For D4, there was no responder in the income group of less than \$250, the highest  
134 mean KS (3.7) was discovered in the income group of \$250-500 per month, and the highest  
135 mean AS (3.6) and mean PS (8.1) were found in the income group of more than \$500 per month  
136 (Table3). In D5, the 3–5-year farm's age group had the highest mean KS (4.5), mean AS (4),  
137 and mean PS (8.6) (Table 3). For D6, the highest mean KS (4.3) and mean AS (4) were recorded  
138 in the group of fewer than 15 animals on the farm, whereas the highest mean PS (8.6) was  
139 identified in the group of more than 25 animals in the farm (Table3). However, the differences  
140 between KS, AS, and PS among demographic characteristics (D1 to D6) were insignificant (p  
141 > 0.05) (Table 3).

142 **Table 3: Impact of demographic characteristics on knowledge, attitude and biosecurity**  
143 **practice measures of the farmers (N=15 ).**

| ID        | Description         | Frequency |      | Knowledge Score (KS) |         | Attitude Score (AS) |         | Practice Score (PS) |         |
|-----------|---------------------|-----------|------|----------------------|---------|---------------------|---------|---------------------|---------|
|           |                     | n         | %    | Mean±SD              | p-value | Mean±SD             | p-value | Mean±SD             | p-value |
| <b>D1</b> | <b>Farmer's Age</b> |           |      |                      |         |                     |         |                     |         |
|           | < 30 years          | 2         | 13.3 | 2.0 ±0               | 0.19    | 3.7 ± 1.5           | 0.37    | 7.0 ±2.8            | 0.34    |
|           | 30-40 years         | 10        | 66.7 | 3.7 ±1.5             |         | 3.5 ±1.7            |         | 7.7 ±2.1            |         |



|                                                      |   |      |          |      |           |      |          |      |
|------------------------------------------------------|---|------|----------|------|-----------|------|----------|------|
| >40 years                                            | 3 | 20.0 | 4.0 ±1   |      | 3.67 ±1.5 |      | 9.3 ±1.1 |      |
| <b>D2 Farmer's Educational Qualification</b>         |   |      |          |      |           |      |          |      |
| Primary                                              | 5 | 33.3 | 3.6 ±1.8 |      | 2.8 ±1.9  |      | 7.4 ±2.7 |      |
| Secondary                                            | 7 | 46.7 | 3.7 ±1.3 | 0.78 | 3.8 ±1.3  | 0.35 | 8.0 ±1.8 | 0.81 |
| Graduation                                           | 3 | 20.0 | 3.0 ±1   |      | 3.0 ±1.7  |      | 8.6 ±1.5 |      |
| <b>D3 Farmer's Farming Experience</b>                |   |      |          |      |           |      |          |      |
| <10 years                                            | 9 | 60.0 | 3.7 ±1.2 |      | 3.4 ±1.6  |      | 8.1 ±2.0 |      |
| 10-20 years                                          | 4 | 26.7 | 3.3 ±1.9 | 0.84 | 2.5 ±1.3  | 0.35 | 7.3 ±2.5 | 0.81 |
| >20 years                                            | 2 | 13.3 | 3.5 ±2.1 |      | 4.5 ±2.1  |      | 8.5 ±2.1 |      |
| <b>D4 Farmer's Income class (USD (\$) per month)</b> |   |      |          |      |           |      |          |      |
| < \$250                                              | 0 | 0    | -        |      | -         |      | -        |      |
| \$250-\$500                                          | 6 | 40.0 | 3.7 ±1.6 | 0.80 | 3.0 ±1.0  | 0.67 | 7.7 ±2.3 | 0.58 |
| > \$500                                              | 9 | 60.0 | 3.4 ±1.3 |      | 3.6 ±1.9  |      | 8.1 ±1.9 |      |
| <b>D5 Age of the farm</b>                            |   |      |          |      |           |      |          |      |
| < 3 years                                            | 4 | 26.7 | 3.0 ±1.4 |      | 2.5 ±1    |      | 7.8 ±2.2 |      |
| 3-5 years                                            | 6 | 40.0 | 4.5 ±1.1 | 0.08 | 4.0 ±1.6  | 0.30 | 8.6 ±1.9 | 0.53 |
| >5 years                                             | 5 | 33.3 | 2.8 ±1.3 |      | 3.2 ±1.9  |      | 7.2 ±2.2 |      |
| <b>D6 Number of animals in farm</b>                  |   |      |          |      |           |      |          |      |
| < 15                                                 | 4 | 26.7 | 4.3 ±0.9 |      | 4 ±1.8    |      | 8.5 ±2.4 |      |
| 15 - 25                                              | 8 | 53.3 | 3.4 ±1.5 | 0.39 | 3.0 ±1.7  | 0.58 | 7.4 ±2.1 | 0.63 |
| > 25                                                 | 3 | 20.0 | 3 ±1.7   |      | 3.3 ±1.2  |      | 8.6 ±1.5 |      |

144 SD = Standard Deviation; Independent-Samples Kruskal-Wallis statistical test was used to  
 145 compare different categories of different demographic characteristics; Statistically significance  
 146 = p-value < 0.05;

147

#### 148 *Associations of K4-A1, K6-P11 and A4-Practice scores*

149 We found the association of A1 (I think seminars and training sessions on dairy farming are  
 150 useful) was significantly different (p < 0.05) among the response of K4 (Knowledge about  
 151 training and seminar) (Table 4). We found no significant difference (p >0.05) in the case of  
 152 P11 (Footbath in the entrance) among K6 (Knowledge of disease spread from an outsider or  
 153 neighboring farm) (Table 4). The farmers who were satisfied with their hygiene management  
 154 (A4) used to have higher practice scores (PS) (Figure 2) and a significant difference (p < 0.05)

155 in the association was found in the case of PS (Practice score) and A4 (I am satisfied about  
156 hygiene management in the farm) (Table 4).

157 **Table 4: Associations between K4-A1, K6-P11 and A4-Practice score (PS).**

|                                 | Test statistic<br>(Independent-Samples<br>Kruskal-Wallis) | p-value |
|---------------------------------|-----------------------------------------------------------|---------|
| <b>K4 – A1</b>                  | 4.00                                                      | 0.046*  |
| <b>K6 - P11</b>                 | 0.01                                                      | 0.922   |
| <b>A4 – Practice score (PS)</b> | 4.02                                                      | 0.045*  |

158 Here in the table, K4= “Knowledge about training and seminar.”; K6 = “Knowledge of disease  
159 spread from outsider or neighboring farm.”; A1= “I think seminars and training session on  
160 dairy farming are useful.”; A4= “I am satisfied about hygiene management in the farm.”; P11=  
161 “Footbath in the entrance.”; \*Statistically significant ( $p < 0.05$ );

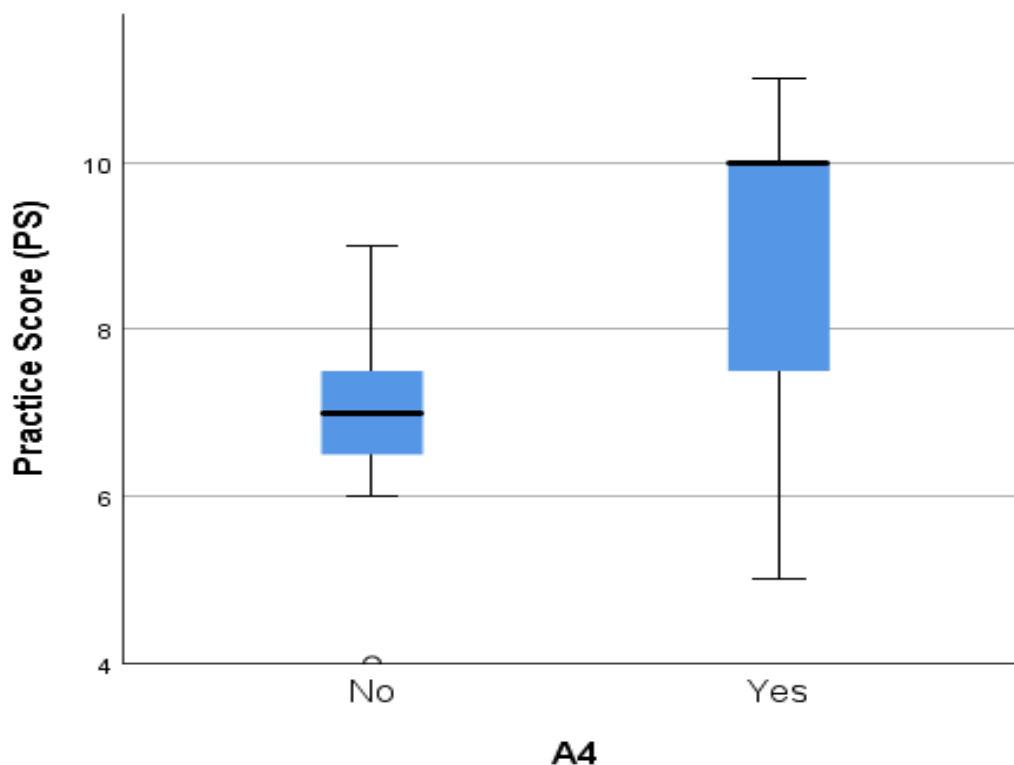

162 **Figure 2: Distribution of practice scores (PS) across A4 response of the farmers (N= 15).**  
163 (Here, A4= “I am satisfied about hygiene management in the farm.”)  
164

165 ***Correlation among knowledge, attitude and practice***

166 Knowledge had a very strong correlation ( $r = 0.71$ ) with practice and had a strong correlation  
 167 ( $r = 0.65$ ) with attitude (Table 5). On the other hand, attitude and practice also had a strong  
 168 correlation ( $r = 0.64$ ) between them (Table 5). We found significant differences ( $p < 0.05$ ) in  
 169 correlations between knowledge-attitude, knowledge-practice, and attitude-practice (Table 5).

170 **Table 5: Correlation among farmer’s knowledge, attitude and practice regarding farm**  
 171 **biosecurity measures.**

| Variable             | Spearman Correlation coefficient (r) | p-value | 95% CI lower to Upper |
|----------------------|--------------------------------------|---------|-----------------------|
| Knowledge – Attitude | 0.71                                 | 0.011*  | 0.1862 to 0.8749      |
| Knowledge – Practice | 0.65                                 | 0.004*  | 0.3001 to 0.9005      |
| Attitude – Practice  | 0.64                                 | 0.012*  | 0.1784 to 0.8729      |

172 \*Statistically significant ( $p < 0.05$ );

173

174 ***Correlation between incidence of non-specific enteritis and biosecurity practice score***

175 The highest non-specific enteritis incidence in 2 months was 12 experienced by the farmer and  
 176 his family members, and in that particular farm, the biosecurity practice score was the lowest  
 177 (4) (Table 6). The highest farm biosecurity practice score recorded was 11 and the incidence  
 178 of non-specific enteritis experienced by the farmer and family members on this farm was 2  
 179 (Table 6). The lowest incidence was found 0 where the farm biosecurity score was 10 (Table  
 180 6). The correlation found between non-specific enteritis incidence and biosecurity practice  
 181 score was  $r = -0.9232$  (Figure 3). The correlation between non-specific enteritis incidence and  
 182 biosecurity practice score was significant ( $p < 0.05$ ) (Figure 3).

183 **Table 6: Biosecurity practice scores and the number of non-specific enteritis experienced**  
 184 **by the farmers (N=15) or family members.**

| Farm ID | Non-specific enteritis experienced by the farmer or farmer’s family (Last 2 months) | Biosecurity practice scores |
|---------|-------------------------------------------------------------------------------------|-----------------------------|
| 1       | 10                                                                                  | 5                           |
| 2       | 3                                                                                   | 9                           |
| 3       | 12                                                                                  | 4                           |
| 4       | 6                                                                                   | 7                           |
| 5       | 8                                                                                   | 7                           |
| 6       | 6                                                                                   | 7                           |

|    |   |    |
|----|---|----|
| 7  | 2 | 10 |
| 8  | 7 | 6  |
| 9  | 5 | 7  |
| 10 | 0 | 10 |
| 11 | 2 | 11 |
| 12 | 1 | 10 |
| 13 | 5 | 8  |
| 14 | 3 | 10 |
| 15 | 6 | 8  |

185 Here, Biosecurity practice score is equal to the Practice scores (PS) of the farms;

186

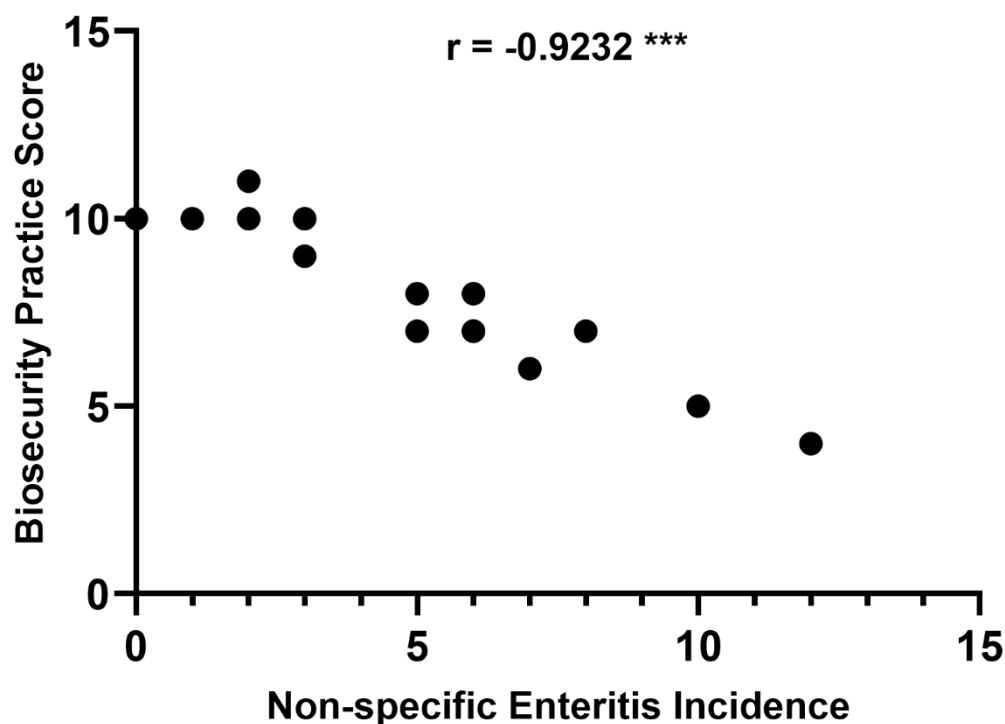

187

188 **Figure 3: Distribution and correlation of non-specific enteritis incidence and biosecurity**

189 **practice scores of the farmers.** (Here, 'r' = Spearman's correlation coefficient; Significance

190 level was considered as p-value < 0.05; '\*\*\*' = p-value < 0.001;)

191

## 192 Discussion

193 In this current study, a relatively small sample size was used, that is because the study area

194 does not accommodate many commercial dairy farms and also all farms cannot be visited due

195 to lack of time and unwillingness of the owner to participate in the survey. However, the present

196 study contains enough information to understand the knowledge, attitude, and practice of

197 biosecurity among the farmers of the study area.

198 Previous studies show that knowledge, attitude, and practice are associated with one another,  
199 and demographic characteristics can also have an impact on knowledge, attitude, and practice  
200 (Can & Altuğ, 2014; Jafari-Gh et al., 2020; Makita et al., 2020; Mateo et al., 2021). So, we  
201 hypothesized – (1) Demographic characteristics have influences on the knowledge, attitude,  
202 and practice of biosecurity measures; (2) Knowledge, attitude, and practice of biosecurity  
203 measures are strongly correlated. Furthermore, animal and human health are closely related  
204 because of the possibility of direct or indirect pathogen transmission between them, and dairy  
205 farms and dairy products are considered to be possible sources of pathogens that could cause  
206 human health problems including gastroenteritis (An et al., 2018; Pell, 1997; Stein & Katz,  
207 2017; Youssef et al., 2021). So, without proper biosecurity measurements, there is a possibility  
208 of transmission of pathogens from the dairy farm environment or dairy products to the farmers  
209 or dairy product consumers. Hence, we developed the hypothesis- there is a strong correlation  
210 between the practice of biosecurity measures and the incidence of non-specific enteritis in  
211 farmers and their family members who are directly or indirectly related to the farms or consume  
212 milk from that farm.

### 213 *Frequency percentages and mean scores of knowledge, attitude and practice*

214 Seminars and training sessions about biosecurity can increase awareness and 80% of the  
215 farmers had knowledge about seminars and training sessions (K4) (Table 1). But only 53.3%  
216 agreed that seminars and training sessions are useful (A1) (Table 1). Another impactful  
217 measure is to keep disease records on farms but only 60% of the farmers knew about record-  
218 keeping (K5) (Table 1) contrast to the European survey which reported that about 73% to 91%  
219 of dairy farmers used to keep a record (Denis-Robichaud et al., 2019). The disease can be  
220 spread through indirect or direct contact in various ways like different farm visiting personnel  
221 and different equipment from other farms (Brennan & Christley, 2012). So, it is necessary to  
222 minimize the risk by adopting biosecurity measures but less than half of the farmers (46.7%)  
223 knew about the possible spreading of diseases from outsider's entrance or neighboring farms  
224 (K6) (Table 1) and only 13.3% used to have footbath on the entrance of the farm (P11) (Table  
225 2). However, 73.3% believed that only necessary visits should be allowed in the farm (A5)  
226 (Table 1). Regular cleaning and disinfection reduce biosecurity risks of a farm. In present study,  
227 93.3% of the farmers did regularly cleaning and disinfection of their farms (P10) (Table 2).  
228 Another aspect of reducing disease risk is to test diseases before buying any new animals and  
229 vaccination against diseases (Denis-Robichaud et al., 2019). According to a previous study,  
230 about 86% of Irish dairy farmers and 70% of Canadian dairy farmers used to vaccinate their

231 animals with at least a single dose (Denis-Robichaud et al., 2019). In the present study, 86.7%  
232 practiced vaccination of animals against common contagious diseases (P7) (Table 2). A  
233 previous study also reported that around 46% of Canadian farmers used to test for disease  
234 before introducing new animals to the farm (Denis-Robichaud et al., 2019). However, in the  
235 current study most farmers (86.7%) used to test diseases before buying new animals (P1) (Table  
236 2).

### 237 *Comparison of knowledge, attitude and practice scores of demographic characteristics*

238 From (Table 3), D1 (Farmer's age) shows that elderly farmers (>40 years) tend to have more  
239 knowledge (4.0 KS) and have better practice (9.3 PS). Maybe the elderly farmers (>40 years)  
240 are more likely to gather information and implement biosecurity practices by replicating  
241 practices from other farms but less likely to believe that these practices are actually necessary.  
242 However, we found no significant differences ( $p > 0.05$ ) in KS, AS, and PS among the age  
243 groups which is supported by the previous findings (Can & Altuğ, 2014). D2 (Farmer's  
244 educational qualification) demonstrates that farmers with a graduation level of educational  
245 background tend to adopt better biosecurity practices (8.6 PS) but their attitude and knowledge  
246 regarding biosecurity may lack (Table 3). A previous study found that highly educated farmers  
247 tend to have better biosecurity scores (Can & Altuğ, 2014). It was also found that educational  
248 level had a significant impact on farmers' knowledge, attitude, and practice (Jafari-Gh et al.,  
249 2020). However, we did not find any significant differences ( $p > 0.05$ ) in KS, AS, and PS among  
250 educational level (D2) which contradicts the findings of (Can & Altuğ, 2014) (Table 3).

251 D3 (Farmer's farming experience) shows that farmers with less experience (< 10 years) had  
252 better knowledge (3.7 KS) but those who had experienced over 20 years had better attitude (4.5  
253 AS) and practice (8.5) (Table 3). It is possibly because; the less experienced farmers try to  
254 thrive knowledge for the betterment of the farm but cannot implement the knowledge. No  
255 significant differences were found ( $p > 0.05$ ) among farming experience (D3) which is  
256 supported by the findings of (Can & Altuğ, 2014) ( $p > 0.05$ ). In the case of income class (D4),  
257 results depict that, farmers with higher income (> \$500 / month) had lesser knowledge about  
258 biosecurity but a better attitude (3.6 AS) and practice (8.1 PS) than the farmers of middle-  
259 income (\$250-500/ month) group (Table 3). However, the differences of KS, AS, and PS  
260 among income class were not significant ( $p > 0.05$ ) (Table 3), but this result indicates that  
261 having knowledge about biosecurity does not always results in practices of biosecurity  
262 measures. As previously noted by veterinarians, a lack of knowledge of biosecurity is not only

263 the reason for implementing biosecurity in farms but also farmers' attitudes and will also play  
264 important roles (Pritchard, Wapenaar, & Brennan, 2015). A previous study also found that  
265 higher income resulted in higher biosecurity scores (Can & Altuğ, 2014). It was also reported  
266 that higher income has a high impact on the knowledge, attitude, and practice of a farmer  
267 (Jafari-Gh et al., 2020).

268 From current findings, D5 (Age of the farm) shows that farmers from the farms which existed  
269 for 3 to 5 years had better knowledge (4.5 KS), attitude (4.0 AS), and practice (8.6 PS) (Table  
270 3). This depicts that certain periods after the starting of farms perform better in biosecurity  
271 measures but in the state introductory period the farmers may lack resources to access  
272 information about biosecurity measures. On the other hand, farmers from farms with ages more  
273 than 5 years may be reluctant to consider biosecurity measures as necessary because the farm  
274 has already survived a long time. D6 (Number of animals in farm) shows that farms with less  
275 than 15 animals have better knowledge (4.3 KS) and attitude (4 AS) but farms with more than  
276 25 animals have better practice (8.6 PS) (Table 3). Larger herd size results in higher biosecurity  
277 scores were also found in a previous study (Can & Altuğ, 2014). Also, farms with large herd  
278 sizes may have better biosecurity because these farms have a higher risk of losses due to  
279 diseases (Jafari-Gh et al., 2020). However, we didn't find any significant differences ( $p > 0.05$ )  
280 of KS, AS, and PS in the case of D5 and D6 (Table 3). Finally based on the current study  
281 findings, we rejected our alternative hypothesis that demographic characteristics have  
282 influences on the knowledge, attitude, and practice of biosecurity measures.

### 283 *Associations of K4-A1, K6-P11 and A4-Practice scores*

284 Believing seminars and training sessions could be useful (A1) was significantly different ( $p <$   
285  $0.05$ ) between the farmers who had knowledge of training and seminars (K4) and who didn't  
286 (Table 4). Though training sessions and seminars are important for improving biosecurity and  
287 policy making of farms, negative attitudes and fatigue still exist among farmers. To improve  
288 the situation, the responsible factors should be identified and alternative approaches need to be  
289 formulated to motivate and engage the farmers in seminars and training (Hamilton, Evans, &  
290 Allcock, 2019). In this present study, whether farmers knew about the risk of disease spreading  
291 through neighboring farms or outsiders (K6), didn't significantly affect the practice of using  
292 footbath (P11) ( $p > 0.05$ ) (Table 4). But using footbaths on the farm can improve the bovine  
293 feet health and reduce biosecurity risk in farms (Fjeldaas et al., 2014). Additionally, using  
294 footbath in farms should be an essential practice in the current study area as it is considered to



295 be a hot spot for contagious diseases like FMD (Rahman et al., 2020). The current study results  
296 also revealed that practicing better biosecurity measures (higher practice score) was closely  
297 related to having satisfaction with the hygiene management of the farm (A4) (Table 4; Figure  
298 2). But that doesn't exclude the chances that farmers will not be satisfied with less biosecurity  
299 practices. Hence, if it could be possible to broaden the satisfaction margin of the farmers then  
300 they would be automatically encouraged to adopt better biosecurity measures.

### 301 ***Correlation among knowledge, attitude and practice***

302 Knowledge, attitude, and practice had a strong positive correlation with one another (Table 5).  
303 That means a change in one of these variables will affect another factor in a positive direction.  
304 If the farmer had better knowledge of biosecurity, it would result in a positive attitude toward  
305 biosecurity measures and better practices. However, farmers' perceptions of biosecurity may  
306 evolve and change and may not be consistent over time (Brennan & Christley, 2013). So,  
307 knowledge of biosecurity should be disseminated with a standard guideline, and regular  
308 training should be provided to keep the farmers updated with new information. Previous  
309 research has also found that improved knowledge leads to more positive attitudes, and positive  
310 attitudes lead to more biosecurity practices (Makita et al., 2020). So, three of these factors  
311 coexist together for the improvement of biosecurity measures in farms. Hence, based on current  
312 study findings (Table 5), we accepted our alternative hypothesis that there are associations  
313 among the knowledge, attitude, and practice of biosecurity measures.

### 314 ***Correlation between incidence of non-specific enteritis and biosecurity practice score***

315 The notion of biosecurity has gained importance over the years due to the numerous hazards  
316 and heightened animal-associated risks brought on by demographic and environmental  
317 changes, along with globalization and international exchange (Lytras, Xia, Hughes, Jiang, &  
318 Robertson, 2021). Dairy cattle had been identified as potential reservoir pathogens such as  
319 *Campylobacter* which causes human gastroenteritis (An et al., 2018). Gastroenteritis-causing  
320 pathogens like *Escherichia coli* had also been identified in dairy milk and farms as well (Stein  
321 & Katz, 2017). These pathogens can easily transmit to humans via milk or direct contact with  
322 farm utensils due to a lack of biosecurity measures. The strong correlation ( $r = -0.9232$ )  
323 between the incidence of non-specific enteritis and farm biosecurity practice score found in the  
324 current study (Figure 3) demonstrates that adaption of more biosecurity measures reduces the  
325 incidences of non-specific enteritis among farmers and their family members who are directly  
326 or indirectly related to the farms or consume milk from that farm. Previous study shows that

327 the implementation of good biosecurity measures reduces the transmission of pathogens from  
328 livestock to human (Youssef et al., 2021). Moreover, limiting dairy farms as the only reason  
329 for non-specific enteritis would not be a wise discussion. Because enteritis could also develop  
330 from other food sources such as broiler meat (la Mora et al., 2020). But the significant ( $p <$   
331  $0.05$ ) correlation between enteritis and farm biosecurity practice score found in the current  
332 study cannot be ignored as well (Figure 3). However, the finding in our current study about the  
333 correlation of enteritis and biosecurity measures do not claim that the incidences of non-  
334 specific enteritis only depend on the biosecurity measures of the firm, rather from our findings,  
335 the assumption may be made that biosecurity practice does influence the health of the  
336 individuals who are directly or indirectly connected to the products or the environment of the  
337 farms. For a stronger claim on the biosecurity practice-enteritis relationship, a thorough study  
338 would be needed for identifying enteritis-causing organisms in the farm environment or farm  
339 products, and the causal agent of enteritis in the individuals who are in contact with the firm,  
340 and analysis of genetic homology of those microorganisms.

341 The current study revealed that demographic characteristics do not influence knowledge,  
342 attitude, and practice of biosecurity measures. Knowledge, attitude, and practice are highly and  
343 positively correlated with one another. With better knowledge, the farmers' attitude and  
344 practice of biosecurity measures improve. Biosecurity score is also correlated with non-specific  
345 enteritis incidence. Having higher farm biosecurity practice measures reduces the incidence of  
346 non-specific enteritis in individuals who are directly in contact with the farm or consume milk  
347 from that farm. However, awareness is needed to be increased for a better understanding and  
348 implementation of biosecurity measures. Finally, further studies are needed to establish a  
349 strong claim.

## 350 **Conclusion**

351 Our study reveals most of the small-scale dairy farmers of Sylhet District, Bangladesh, are  
352 experiencing non-specific enteritis. And the knowledge, attitudes, and current biosecurity  
353 practices are yet to gain a satisfactory level to prevent zoonosis such as non-specific enteritis.  
354 So, the farmers need more awareness and relevant training to enhance their biosecurity  
355 practices regarding public health importance.

356

357

358 **References**

- 359 An, J.-U., Ho, H., Kim, J., Kim, W.-H., Kim, J., Lee, S., ... Cho, S. (2018). Dairy cattle, a  
360 potential reservoir of human campylobacteriosis: Epidemiological and molecular  
361 characterization of campylobacter jejuni from cattle farms. *Frontiers in Microbiology*, 9.  
362 <https://doi.org/10.3389/fmicb.2018.03136>
- 363 Baqui, A. H., Black, R. E., Yunus, M., Hoque, A. R. A., Chowdhury, H. R., & Sack, R. B.  
364 (1991). Methodological issues in diarrhoeal diseases epidemiology: Definition of  
365 diarrhoeal episodes. *International Journal of Epidemiology*, 20(4), 1057–1063.  
366 <https://doi.org/10.1093/ije/20.4.1057>
- 367 Brennan, M. L., & Christley, R. M. (2012). Biosecurity on Cattle Farms: A study in North-  
368 West England. *PLoS ONE*, 7(1), e28139.  
369 <https://doi.org/https://dx.doi.org/10.1371/journal.pone.0028139>
- 370 Brennan, M. L., & Christley, R. M. (2013). Cattle producers' perceptions of biosecurity. *BMC*  
371 *Veterinary Research*, 9, article 71. <https://doi.org/10.1186/1746-6148-9-71>
- 372 Can, M. F., & Altuğ, N. (2014). Socioeconomic implications of biosecurity practices in small-  
373 scale dairy farms. *Veterinary Quarterly*, 34(2), 67–73.  
374 <https://doi.org/10.1080/01652176.2014.951130>
- 375 Castells, M., & Colina, R. (2021). Viral Enteritis in Cattle: To Well Known Viruses and  
376 Beyond. *Microbiology Research*, Vol. 12, pp. 663–682.  
377 <https://doi.org/10.3390/microbiolres12030048>
- 378 Denis-Robichaud, J., Kelton, D. F., Bauman, C. A., Barkema, H. W., Keefe, G. P., & Dubuc,  
379 J. (2019). Biosecurity and herd health management practices on Canadian dairy farms.  
380 *Journal of Dairy Science*, 102(10), 9536–9547. <https://doi.org/10.3168/jds.2018-15921>
- 381 Dey, S. K., Nguyen, T. A., Phan, T. G., Nishio, O., Salim, A. F. M., Rahman, M., ... Ushijima,  
382 H. (2007). Molecular and epidemiological trend of norovirus associated gastroenteritis in  
383 Dhaka City, Bangladesh. *Journal of Clinical Virology*, 40(3), 218–223.  
384 <https://doi.org/10.1016/j.jcv.2007.08.005>
- 385 Fjeldaas, T., Knappe-Poindecker, M., Bøe, K. E., & Larssen, R. B. (2014). Water footbath,  
386 automatic flushing, and disinfection to improve the health of bovine feet. *Journal of Dairy*  
387 *Science*, 97(5), 2835–2846. <https://doi.org/10.3168/JDS.2013-7531>

- 388 Hamilton, L., Evans, N., & Allcock, J. (2019). “I don’t go to Meetings”: understanding farmer  
389 perspectives on bovine TB and biosecurity training. *Veterinary Record*, 184(13), 410–  
390 410. <https://doi.org/10.1136/VR.104995>
- 391 Jafari-Gh, A., Laven, R. A., Eila, N., Yadi, J., Hatami, Z., Soleimani, P., ... Heidari, E. (2020).  
392 Transboundary and infectious diseases of small ruminants: Knowledge, attitude, and  
393 practice of nomadic and semi-nomadic pastoralists in northern Iran. *Small Ruminant*  
394 *Research*, 183. <https://doi.org/10.1016/j.smallrumres.2019.106039>
- 395 la Mora, Z. V. De, Macías-Rodríguez, M. E., Arratia-Quijada, J., Gonzalez-Torres, Y. S.,  
396 Nuño, K., & Villarruel-López, A. (2020). Clostridium perfringens as foodborne pathogen  
397 in broiler production: Pathophysiology and potential strategies for controlling necrotic  
398 enteritis. *Animals*, 10(9), 1–28. <https://doi.org/10.3390/ani10091718>
- 399 Lytras, S., Xia, W., Hughes, J., Jiang, X., & Robertson, D. L. (2021). The animal origin of  
400 SARS-CoV-2. *Science*, 373(6558), 968–970. <https://doi.org/10.1126/science.abh0117>
- 401 Makita, K., Steenbergen, E., Haruta, L., Hossain, S., Nakahara, Y., Tamura, Y., ... Asakura,  
402 S. (2020). Quantitative Understanding of the Decision-Making Process for Farm  
403 Biosecurity Among Japanese Livestock Farmers Using the KAP-Capacity Framework.  
404 *Frontiers in Veterinary Science*, 7. <https://doi.org/10.3389/fvets.2020.00614>
- 405 Mateo, J. P., Campbell, I., Cottier-Cook, E. J., Luhan, M. R. J., Ferriols, V. M. E. N., &  
406 Hurtado, A. Q. (2021). Understanding biosecurity: knowledge, attitudes and practices of  
407 seaweed farmers in the Philippines. *Journal of Applied Phycology*, Vol. 33, pp. 997–1010.  
408 <https://doi.org/10.1007/s10811-020-02352-5>
- 409 Pell, A. N. (1997). Manure and microbes: public and animal health problem? *Journal of Dairy*  
410 *Science*, 80(10), 2673–2681. [https://doi.org/10.3168/jds.S0022-0302\(97\)76227-1](https://doi.org/10.3168/jds.S0022-0302(97)76227-1)
- 411 Pritchard, K., Wapenaar, W., & Brennan, M. L. (2015). Cattle veterinarians’ awareness and  
412 understanding of biosecurity. *Veterinary Record*, 176(21), 546.  
413 <https://doi.org/10.1136/vr.102899>
- 414 Rahman, A. K. M. A., Islam, S. K. S., Sufian, M. A., Talukder, M. H., Ward, M. P., & Martínez-  
415 López, B. (2020). Foot-and-Mouth Disease Space-Time Clusters and Risk Factors in  
416 Cattle and Buffalo in Bangladesh. *Pathogens*, 9, 423.  
417 <https://doi.org/10.3390/PATHOGENS9060423>

418 Stein, R. A., & Katz, D. E. (2017). Escherichia coli, cattle and propagation of disease. *FEMS*  
419 *Microbiology Letters*, 364(6). <https://doi.org/10.1093/femsle/fnx050>

420 Youssef, D. M., Wieland, B., Knight, G. M., Lines, J., & Naylor, N. R. (2021). The  
421 effectiveness of biosecurity interventions in reducing the transmission of bacteria from  
422 livestock to humans at the farm level: A systematic literature review. *Zoonoses and Public*  
423 *Health*, 68(6), 549–562. <https://doi.org/10.1111/zph.12807>

424

425
